# Supplementary material
Source: PubMed Central journal article supplement (PMC6062295)
Supplement: TX-006-C7TX00046D-s001.pdf [file TX-006-C7TX00046D-s001.pdf]

Table S1. Description of all mutants.

| Gene Symbol and Allele | Gene Description                                                                                                                                                                                                     | Phenotype                                                    |
|------------------------|----------------------------------------------------------------------------------------------------------------------------------------------------------------------------------------------------------------------|--------------------------------------------------------------|
| <i>lin-45(n2520)</i>   | Abnormal cell lineage. Encodes an ortholog of the vertebrate protein RAF (MAPKKK)                                                                                                                                    |                                                              |
| <i>mek-2(n1989)</i>    | Encodes a MAPKK or ERK Kinase                                                                                                                                                                                        |                                                              |
| <i>ksr-1(ku68)</i>     | One of two <i>C. elegans</i> Kinase Suppressor of Ras paralogs                                                                                                                                                       |                                                              |
| <i>mpk-1(ku1)</i>      | Encodes a MAPK an ERK ortholog functioning                                                                                                                                                                           | susceptibility to pathogens                                  |
| <i>mek-1(ks54)</i>     | Encodes a MAPKK or ERK Kinase. The highest homology to mammalian MKK7                                                                                                                                                | Hypersensitive to copper and cadmium ions, and to starvation |
| <i>jkk-1(km2)</i>      | JNK Kinase. Encodes a member of the MAPKK superfamily                                                                                                                                                                | Abnormal locomotion phenotype.                               |
| <i>mkk-4(ju91)</i>     | Encodes a MAPKK that is a member of the MKK4 family                                                                                                                                                                  |                                                              |
| <i>jnk-1(gk7)</i>      | Encodes a serine/threonine kinase that is the sole <i>C. elegans</i> member of the JNK subgroup of MAPK                                                                                                              | Hypersensitive to cadmium ions                               |
| <i>nsy-1(ag3)</i>      | Encodes a MAPKKK. Orthologous to the mammalian ASK family of protein kinases                                                                                                                                         | susceptibility to pathogens                                  |
| <i>sek-1(ag1)</i>      | Encodes a MAPKK(SAPK/ERK kinase). <i>Sek-1</i> has highly similarity with mammalian SEK1/MKK4, MKK6 and MKK3. Functions in the p38 MAPK cascade that regulates innate immunity. Enhanced susceptibility to pathogens | susceptibility to pathogens                                  |
| <i>pmk-1(km25)</i>     | Encodes a MAPK, orthologous to human p38 MAPK. Sensitive to heavy metal and oxidative stress                                                                                                                         | Sensitive to heavy metal and oxidative stress                |
| <i>daf-2(e1370)</i>    | Encodes a receptor tyrosine kinase that is the <i>C. elegans</i> insulin/IGF receptor ortholog                                                                                                                       | Temperature sensitive dauer constitutive                     |
| <i>age-1(hx546)</i>    | Ageing alteration.                                                                                                                                                                                                   | Long life, normal fertility and stress tolerant              |
| <i>daf-16(mu86)</i>    | Abnormal dauer formation. Encodes the sole <i>C. elegans</i> forkhead box O (FOXO) homologue.                                                                                                                        | Dauer defective. Short lived                                 |
| <i>mev-1(kn-1)</i>     | Ortholog of the succinate dehydrogenase cytochrome b560 subunit, an integral membrane protein that is a subunit of mitochondrial respiratory chain complex II                                                        | Oxygen sensitive. Short life span                            |
| <i>mul84 Sod-3</i>     | <i>sod-3p::GFP</i>                                                                                                                                                                                                   | Green expression in head, tail and around vulva.             |
